# Supplementary material for: Solid phase polymerization of phenylenediamine toward a self-supported FeNx/C catalyst with high oxygen reduction activity
Source: Royal Society of Chemistry journal article supplement (doi:10.1039/c5cc06413a), 2015-01-01
Supplement: c5cc06413a1.pdf [file c5cc06413a1.pdf]

Supplementary information

**Solid phase polymerization of phenylenediamine toward self-supported FeN<sub>x</sub>/C catalyst with high oxygen reduction activity**

Xiaogang Su,<sup>a</sup> Jianguo Liu,<sup>\*ab</sup> Yingfang Yao,<sup>ab</sup> Yong You,<sup>a</sup> Xiang Zhang,<sup>a</sup> Canyon Zhao,<sup>a</sup>  
Hong Wan,<sup>a</sup> You Zhou,<sup>a</sup> and Zhigang Zou<sup>\*ab</sup>

<sup>a</sup> Eco-materials and Renewable Energy Research Center, College of Engineering and Applied Sciences, National Laboratory of Solid State Microstructures, Nanjing University, Nanjing China 210093

<sup>b</sup> Kunshan Innovation Institute of Nanjing University, Nanjing China 210093

**1. Catalyst synthesis:** In a typical approach to the synthesis of PpPD-Fe-ZnO catalyst, 1 g p-phenylenediamine, 1 g zinc oxide nanoparticles, 1 g ammonium persulfate, and 0.2 g ferric chloride hexahydrate were ground together. Then the mixtures were transferred to hydrothermal synthesis reactor, which was heated to 150 ° C to allow phenylenediamine to fully polymerize and form poly-p-phenylenediamine(PpPD). The subsequent heat treatment was performed at 950 °C in a nitrogen-gas atmosphere for one hour. The heat-treated sample was then pre-leached in 0.5 M H<sub>2</sub>SO<sub>4</sub> at room temperature for 24 hours, and then thoroughly washed in de-ionized water. In the final step, the catalyst was heat-treated again in nitrogen-gas atmosphere for two hours. The PpPD-Fe was prepared without adding zinc oxide nanoparticles. The PpPD-Fe-Al<sub>2</sub>O<sub>3</sub> was prepared using Al<sub>2</sub>O<sub>3</sub> nanoparticles as hard template.

**2. Rotating disk electrode (RDE) measurements:** RDE measurements were performed using a CHI Electrochemical Station (Model 760e) in a conventional three-electrode cell. A homemade reversible hydrogen electrode was used as a reference electrode. Performance data was recorded at a catalyst loading of 0.9 mgcm<sup>-2</sup> for non-precious samples in 0.1 M HClO<sub>4</sub> at a rotating disk speed of 900 rpm and room temperature. In RDE tests, ORR steady-state polarization curves were recorded with a potential step of 10 mV and a period time of 100 s from 1.0 to 0 V using a negative-going scan.

**3. Fuel cell testing:** Catalyst inks were prepared by ultrasonically mixing catalyst powders with Nafion<sup>®</sup> solution and ethanol. The inks were then applied to the gas diffusion layer, and the cathode catalyst loading was 2.4 mgcm<sup>-2</sup>. A commercial Pt/C (JM, 60%) was used as the anode catalyst, and the loading of Pt was 0.8 mgcm<sup>-2</sup>. Then, the MEA was prepared by hot-pressing, and Nafion 211 membrane was adopted. Fuel cell polarization curve was tested at 80 ° C, H<sub>2</sub> and O<sub>2</sub> flow rates were 300 mLmin<sup>-1</sup> at 100% RH, and no back pressure was applied.

**4. TEM image:** As shown in Figure S1, the morphology of ZnO nanoparticles is irregular.

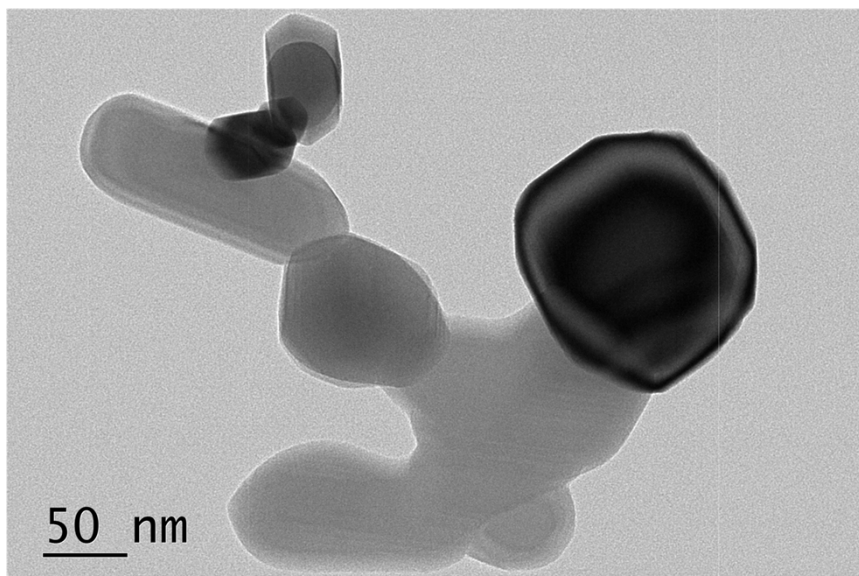

Figure S1. The TEM image of ZnO.

**5. Elemental analysis by XPS:** Elemental quantification of samples were performed using X-ray photoelectron spectroscopy (data shown in Table S1).

Table S1. Elemental quantification analysis of catalysts

|                                            | Atomic concentration, % |             |             |             |             |             |              |
|--------------------------------------------|-------------------------|-------------|-------------|-------------|-------------|-------------|--------------|
|                                            | C 1s                    | O 1s        | N 1s        | S 2p        | Fe 2p       | Zn 2p       | Al 2P        |
| <b>PpPD-Fe-ZnO</b>                         | <b>92.67</b>            | <b>2.67</b> | <b>2.77</b> | <b>0.87</b> | <b>0.28</b> | <b>0.23</b> | <b>0.51</b>  |
| <b>PpPD-Fe</b>                             | <b>88.97</b>            | <b>4.15</b> | <b>3.5</b>  | <b>1.07</b> | <b>0.38</b> | <b>0.17</b> | <b>1.75</b>  |
| <b>PpPD-Fe-Al<sub>2</sub>O<sub>3</sub></b> | <b>65.57</b>            | <b>17.7</b> | <b>1.53</b> | <b>0.53</b> | <b>0.3</b>  | <b>0.25</b> | <b>14.13</b> |
